# Supplementary material for: CAN REINFORCEMENT OCCUR WITH A LEARNED TRAIT?
Source: Oxford University Press journal article supplement (doi:10.1111/j.1558-5646.2011.01286.x), 2011-03-11
Supplement: evo_1286_sm_tablea2.pdf [file evo_1286_sm_tablea2.pdf]

|                                 |                | Males                           |                                 |                                 |                                 |                                 |                                 |                                 |                                 |                                 |                                 |                                 |                                 |                                 |                                 |                                 |                                 |                                 |                                 |                                 |                                 |                               |               |               |               |   |
|---------------------------------|----------------|---------------------------------|---------------------------------|---------------------------------|---------------------------------|---------------------------------|---------------------------------|---------------------------------|---------------------------------|---------------------------------|---------------------------------|---------------------------------|---------------------------------|---------------------------------|---------------------------------|---------------------------------|---------------------------------|---------------------------------|---------------------------------|---------------------------------|---------------------------------|-------------------------------|---------------|---------------|---------------|---|
|                                 |                | A <sub>1</sub>                  |                                 |                                 |                                 |                                 |                                 |                                 |                                 |                                 |                                 | A <sub>2</sub>                  |                                 |                                 |                                 |                                 |                                 |                                 |                                 |                                 |                                 |                               |               |               |               |   |
| F<br>e<br>m<br>a<br>l<br>e<br>s | A <sub>1</sub> | M <sub>1</sub> N <sub>1</sub> 1 | M <sub>1</sub> N <sub>1</sub> 2 | M <sub>1</sub> N <sub>2</sub> 1 | M <sub>1</sub> N <sub>2</sub> 2 | M <sub>1</sub> N <sub>2</sub> 3 | M <sub>2</sub> N <sub>1</sub> 1 | M <sub>2</sub> N <sub>1</sub> 2 | M <sub>2</sub> N <sub>1</sub> 3 | M <sub>2</sub> N <sub>2</sub> 2 | M <sub>2</sub> N <sub>2</sub> 3 | M <sub>1</sub> N <sub>1</sub> 1 | M <sub>1</sub> N <sub>1</sub> 2 | M <sub>1</sub> N <sub>2</sub> 1 | M <sub>1</sub> N <sub>2</sub> 2 | M <sub>1</sub> N <sub>2</sub> 3 | M <sub>2</sub> N <sub>1</sub> 1 | M <sub>2</sub> N <sub>1</sub> 2 | M <sub>2</sub> N <sub>1</sub> 3 | M <sub>2</sub> N <sub>2</sub> 2 | M <sub>2</sub> N <sub>2</sub> 3 |                               |               |               |               |   |
|                                 |                | A <sub>2</sub>                  | M <sub>1</sub> N <sub>1</sub>   | M <sub>1</sub> N <sub>2</sub>   | M <sub>2</sub> N <sub>1</sub>   | M <sub>2</sub> N <sub>2</sub>   | M <sub>1</sub> N <sub>1</sub>   | M <sub>1</sub> N <sub>2</sub>   | M <sub>2</sub> N <sub>1</sub>   | M <sub>2</sub> N <sub>2</sub>   | M <sub>1</sub> N <sub>1</sub>   | M <sub>1</sub> N <sub>2</sub>   | M <sub>2</sub> N <sub>1</sub>   | M <sub>2</sub> N <sub>2</sub>   | M <sub>1</sub> N <sub>1</sub>   | M <sub>1</sub> N <sub>2</sub>   | M <sub>2</sub> N <sub>1</sub>   | M <sub>2</sub> N <sub>2</sub>   | M <sub>1</sub> N <sub>1</sub>   | M <sub>1</sub> N <sub>2</sub>   | M <sub>2</sub> N <sub>1</sub>   | M <sub>2</sub> N <sub>2</sub> |               |               |               |   |
|                                 |                |                                 | 1                               | 1                               | 1                               | 1                               | 1                               | 1                               | 1                               | 1                               | 1                               | 1                               | 1                               | 1                               | 1                               | 1                               | 1                               | 1                               | 1                               | 1                               | 1                               | 1                             | 1             | 1             | 1             | 1 |
|                                 |                | 1                               | 1                               | 1                               | 1                               | 1                               | 1                               | 1                               | 1                               | 1                               | 1                               | 1                               | 1                               | 1                               | 1                               | 1                               | 1                               | 1                               | 1                               | 1                               | 1                               | 1                             | 1             | 1             | 1             | 1 |
|                                 |                | 1                               | 1                               | 1                               | 1                               | 1                               | 1                               | 1                               | 1                               | 1                               | 1                               | 1                               | 1                               | 1                               | 1                               | 1                               | 1                               | 1                               | 1                               | 1                               | 1                               | 1                             | 1             | 1             | 1             | 1 |
|                                 |                | 1+ $\alpha_p$                   | 1+ $\alpha_m$                   | 1+ $\alpha_p$                   | 1+ $\alpha_m$                   | 1                               | 1+ $\alpha_p$                   | 1+ $\alpha_m$                   | 1                               | 1+ $\alpha_m$                   | 1                               | 1+ $\alpha_p$                   | 1+ $\alpha_m$                   | 1+ $\alpha_p$                   | 1+ $\alpha_m$                   | 1                               | 1+ $\alpha_p$                   | 1+ $\alpha_m$                   | 1                               | 1+ $\alpha_m$                   | 1                               | 1+ $\alpha_p$                 | 1+ $\alpha_m$ | 1             | 1+ $\alpha_m$ | 1 |
|                                 | 1              | 1+ $\alpha_h$                   | 1                               | 1+ $\alpha_h$                   | 1                               | 1                               | 1+ $\alpha_h$                   | 1                               | 1+ $\alpha_h$                   | 1                               | 1                               | 1+ $\alpha_h$                   | 1                               | 1+ $\alpha_h$                   | 1                               | 1                               | 1+ $\alpha_h$                   | 1                               | 1+ $\alpha_h$                   | 1                               | 1+ $\alpha_h$                   | 1                             | 1+ $\alpha_h$ | 1             | 1+ $\alpha_h$ |   |
|                                 | 1              | 1+ $\alpha_h$                   | 1                               | 1+ $\alpha_h$                   | 1                               | 1                               | 1+ $\alpha_h$                   | 1                               | 1+ $\alpha_h$                   | 1                               | 1                               | 1+ $\alpha_h$                   | 1                               | 1+ $\alpha_h$                   | 1                               | 1                               | 1+ $\alpha_h$                   | 1                               | 1+ $\alpha_h$                   | 1                               | 1+ $\alpha_h$                   | 1                             | 1+ $\alpha_h$ | 1             | 1+ $\alpha_h$ |   |
|                                 | 1              | 1+ $\alpha_m$                   | 1                               | 1+ $\alpha_m$                   | 1+ $\alpha_p$                   | 1                               | 1+ $\alpha_m$                   | 1+ $\alpha_p$                   | 1+ $\alpha_m$                   | 1+ $\alpha_p$                   | 1                               | 1+ $\alpha_m$                   | 1                               | 1+ $\alpha_m$                   | 1+ $\alpha_p$                   | 1                               | 1+ $\alpha_m$                   | 1+ $\alpha_p$                   | 1+ $\alpha_m$                   | 1+ $\alpha_p$                   | 1                               | 1+ $\alpha_m$                 | 1+ $\alpha_p$ | 1+ $\alpha_m$ | 1+ $\alpha_p$ |   |

**Table A2.** The mating table, showing all the possible matings that can occur in the population under the version of the model where hybrid males can learn pure songs. The genotypes of the females are shown down the right hand side of the table and the phenogenotypes of the males are shown across the top. The value in each cell represents the coefficient of mating, specifically how much more likely a given female is to mate with that particular type of male as opposed to a male that she does not prefer, given that she encounters one of each. In the basic model,  $a_h = 0$ . In the version of the model where hybrids have a preference,  $a_h = a_p$ .
